# Supplementary material for: Biomethanation processes: new insights on the effect of a high H2 partial pressure on microbial communities
Source: Springer Nature journal article supplement (doi:10.1186/s13068-020-01776-y), 2020-08-10
Supplement: MOESM3 [file 13068_2020_1776_MOESM3_ESM.pdf]

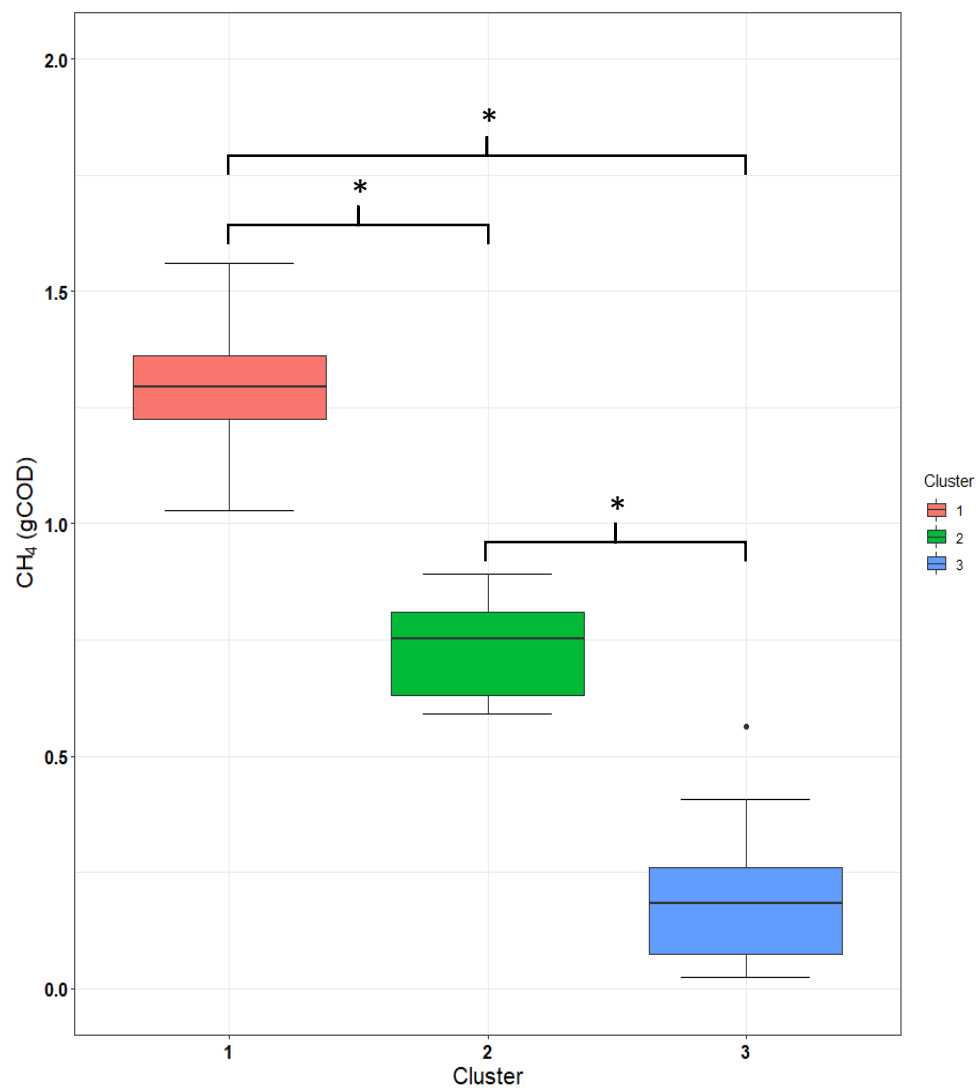

Figure S1a – boxplot showing the distribution of the  $\text{CH}_4$  production values in each cluster. Asterisks show a difference statistically significant between clusters (Wilcoxon,  $p > 0.05$ ).

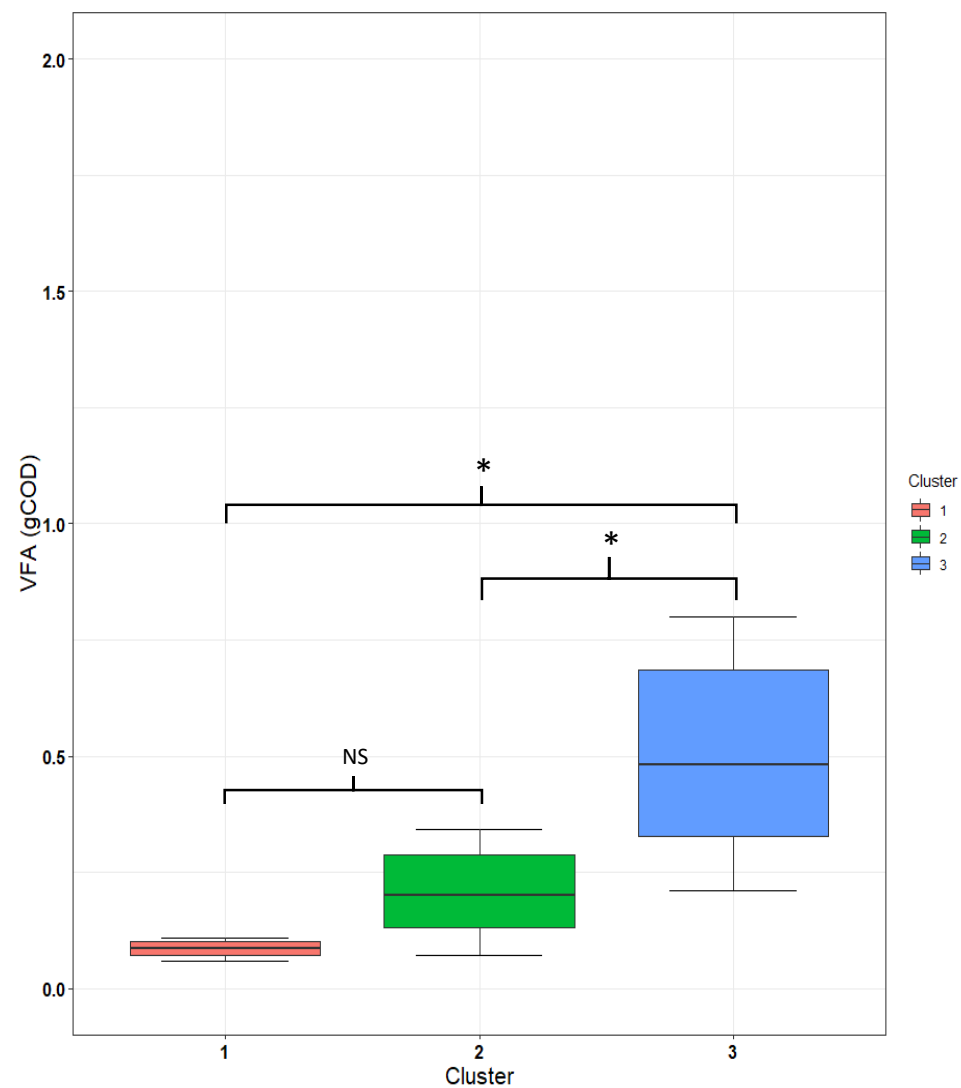

Figure S1b – boxplot showing the distribution of the VFA production values in each cluster. Asterisks show a difference statistically significant between clusters (Wilcoxon,  $p > 0.05$ ), "NS" stands for no significance.
